- JM, Dey SK: Multiple female reproductive failures in cyclooxygenase 2-deficient mice. *Cell* 1997; 91:197-208
31. Cha YI, Kim SH, Solnica-Krezel L, Dubois RN: Cyclooxygenase-1 signaling is required for vascular tube formation during development. *Dev Biol* 2005; 282:274-83
  32. Cha YI, Kim SH, Sepich D, Buchanan FG, Solnica-Krezel L, DuBois RN: Cyclooxygenase-1-derived PGE2 promotes cell motility *via* the G-protein-coupled EP4 receptor during vertebrate gastrulation. *Genes Dev* 2006; 20:77-86
  33. Yeh HC, Wang LH: Profiling of prostanoids in zebrafish embryonic development. *Prostaglandins Leukot Essent Fatty Acids* 2006; 75:397-402
  34. Grosser T, Yusuff S, Cheskis E, Pack MA, FitzGerald GA: Developmental expression of functional cyclooxygenases in zebrafish. *Proc Natl Acad Sci U S A* 2002; 99:8418-23
  35. Eisenberg LM, Markwald RR: Molecular regulation of atrio-ventricular valvuloseptal morphogenesis. *Circ Res* 1995; 77: 1-6
  36. Huang H, Zhang B, Hartenstein PA, Chen JN, Lin S: NKT2 is required for embryonic heart development in zebrafish. *BMC Dev Biol* 2005; 5:7
  37. Glickman NS, Yelon D: Cardiac development in zebrafish: Coordination of form and function. *Semin Cell Dev Biol* 2002; 13:507-13
  38. Dubois RN, Abramson SB, Crofford L, Gupta RA, Simon LS, Van De Putte LB, Lipsky PE: Cyclooxygenase in biology and disease. *Faseb J* 1998; 12:1063-73
  39. Kennedy CR, Zhang Y, Brandon S, Guan Y, Coffee K, Funk CD, Magnuson MA, Oates JA, Breyer MD, Breyer RM: Salt-sensitive hypertension and reduced fertility in mice lacking the prostaglandin EP2 receptor. *Nat Med* 1999; 5:217-20
  40. Hawkey CJ: COX-2 inhibitors. *Lancet* 1999; 353:307-14

## ANESTHESIOLOGY REFLECTIONS

### *The Barn* by Vandam

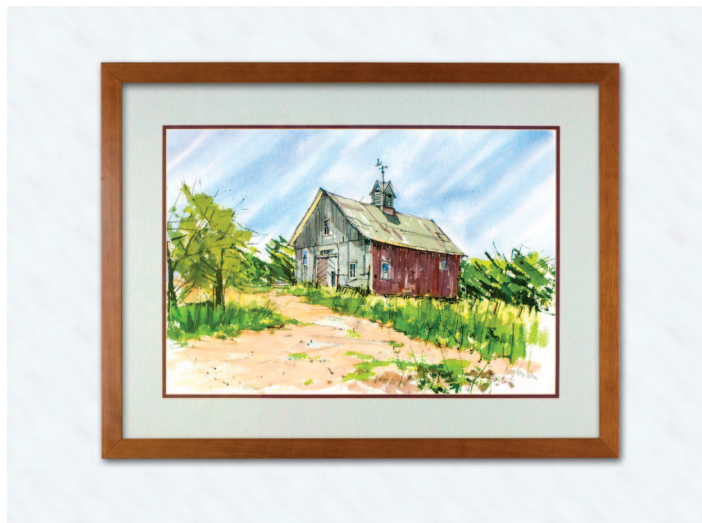

A past Editor of *ANESTHESIOLOGY*, Leroy D. Vandam, M.D., certainly enjoyed creating artworks associated with an earlier Baystater, celebrated etherizer W. T. G. Morton (1819-1868). When Morton was 8 yr of age, his family home in Charlton, Massachusetts, burned to its foundation. By the time a replacement home was erected nearby (as seen in Vandam watercolors *Morton House I* and *II*), Morton's family had already moved to the Waters-Morton House, which Vandam also painted at least twice. So, unlike the buildings in Vandam's other watercolors, this weathered barn (*above*) stands on the actual birth site of Morton. Owned in 1857 by J. Lamb and in 1898 by F. F. Prenier, this 19th century English-style barn has been remodeled for gable-end access. Painted by Vandam in the 1980s, this watercolor was acquired by the Wood Library-Museum in September of 1993. (Copyright © the American Society of Anesthesiologists, Inc. This image also appears in the *Anesthesiology Reflections* online collection available at [www.anesthesiology.org](http://www.anesthesiology.org).)

*George S. Bause, M.D., M.P.H., Honorary Curator, ASA's Wood Library-Museum of Anesthesiology, Park Ridge, Illinois, and Clinical Associate Professor, Case Western Reserve University, Cleveland, Ohio. UJYC@aol.com.*
